# Supplementary material for: Aryl Hydrocarbon Receptor Deficiency Enhances Insulin Sensitivity and Reduces PPAR-α Pathway Activity in Mice
Source: PubMed Central journal article supplement (PMC3261983; doi:10.1289/ehp.1103593), 2011-08-17
Supplement: ehp.1103593.s001.pdf [file ehp.1103593.s001.pdf]

## Supplemental Material for:

# Aryl Hydrocarbon Receptor Deficiency Enhances Insulin Sensitivity and Reduces PPAR- $\alpha$ Pathway Activity in Mice

Chun Wang<sup>1,3\*</sup>, Can-Xin Xu<sup>1,3\*</sup>, Stacey L. Krager<sup>2</sup>, Kathleen M. Bottum<sup>2</sup>, Duan-Fang Liao<sup>4</sup> & Shelley A. Tischkau<sup>1</sup>

\*These authors contributed equally.

<sup>1</sup> Department of Pharmacology, Southern Illinois University School of Medicine, Springfield, Illinois, USA.

<sup>2</sup> Department of Internal Medicine, Southern Illinois University School of Medicine, Springfield, Illinois, USA.

<sup>3</sup> Institute of Pharmacy and Pharmacology, College of Pharmacy and Life Science, University of South China, Hengyang, Hunan, China.

<sup>4</sup> Division of Stem Cell Regulation and Application, State Key Laboratory of Chinese Medicine Powder and Medicine Innovation in Hunan(incubation), Hunan University of Chinese Medicine, Changsha, Hunan, China.

**Corresponding Author:** Shelley A. Tischkau, 801 N Rutledge Rm3354, PO Box 9629, Springfield, Illinois 62974-9629, USA. 217-545-6524, Fax: 217-545-0145, stischkau@siu.edu.

## Supplemental Material Table of Contents

| Item                                 | Page Number |
|--------------------------------------|-------------|
| Supplemental Material, Table.....    | 2           |
| Supplemental Material, Figure 1..... | 3           |
| Supplemental Material, Figure 2..... | 4           |
| Supplemental Material, Figure 3..... | 5           |
| References.....                      | 6           |

**Supplemental Material, Table**

| Gene                     | Direction | Sequence                       | Source                         |
|--------------------------|-----------|--------------------------------|--------------------------------|
| <i>Ahr</i><br>siRNA      | Sense     | GCAGAUGCCUUGGUCUUCUAUGCUU      | Invitrogen                     |
|                          | Antisense | AAGCAUAGAAGACCAAGGCAUCUGC      |                                |
| <i>Bmal1</i><br>siRNA    | Sense     | UGGACGAAGACAAUGAGCCAGACAA      | Invitrogen                     |
|                          | Antisense | UUGUCUGGCUCAUUGUCUUCGUCCA      |                                |
| <i>Pepck</i><br>primers  | Forward   | 5'-CCACAGCTGCTGCAGAACA-3'      | Stone et al. 2004              |
|                          | Reverse   | 5'-GAAGGGTCGCATGGCAA-3'        |                                |
| <i>G6pase</i><br>primers | Forward   | 5'-TGCAAGGGAGAACTCAGCAA-3'     | Bernal-Mizrachi et al.<br>2003 |
|                          | Reverse   | 5'-GGACCAAGGAAGCCACAATG-3'     |                                |
| <i>Aco</i><br>primers    | Forward   | 5'-ATTCTCACAGCAGTGGGATTCC-3    | Tordjman et al. 2001           |
|                          | Reverse   | 5'-CTGCAGCATCATAACAGTGTTCTC-3' |                                |
| <i>Ppar-α</i><br>primers | Forward   | Proprietary                    | Qiagen                         |
|                          | Reverse   | Proprietary                    |                                |
| <i>Pdk4</i><br>Primers   | Forward   | Proprietary                    | Qiagen                         |
|                          | Reverse   | Proprietary                    |                                |
| <i>Cpt1b</i><br>primers  | Forward   | Proprietary                    | Qiagen                         |
|                          | Reverse   | Proprietary                    |                                |

**Supplemental Material, Table. Sequences for antisense and primers.**

Sequences are given for the antisense and primers indicated, along with their source. Qiagen sequences are proprietary.

Supplemental Material, Figure 1

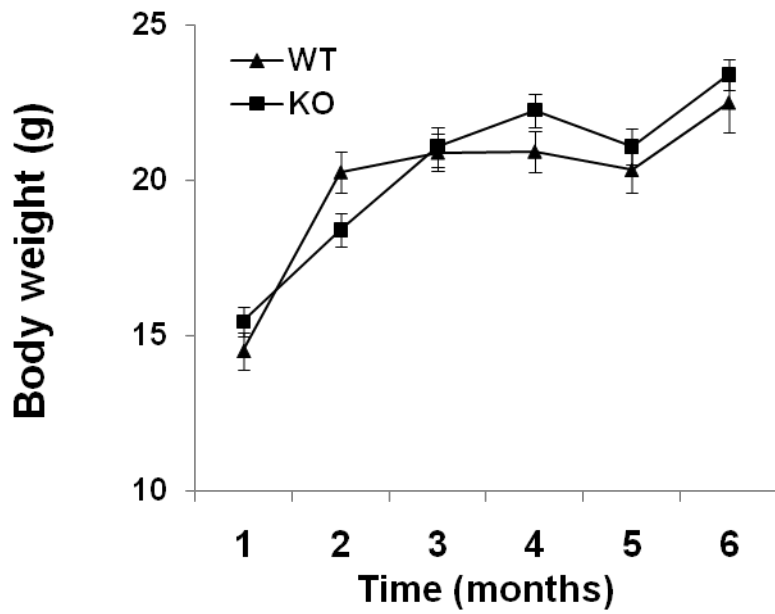

Supplemental Material, Figure1. Average body weights of WT and AhRKO mice.

Mice were weighed at 1, 2, 3, 4, 5 and 6 months of age (n=4 each). **KO**: AhR deficient animal (knockout).

Supplemental Material, Figure 2

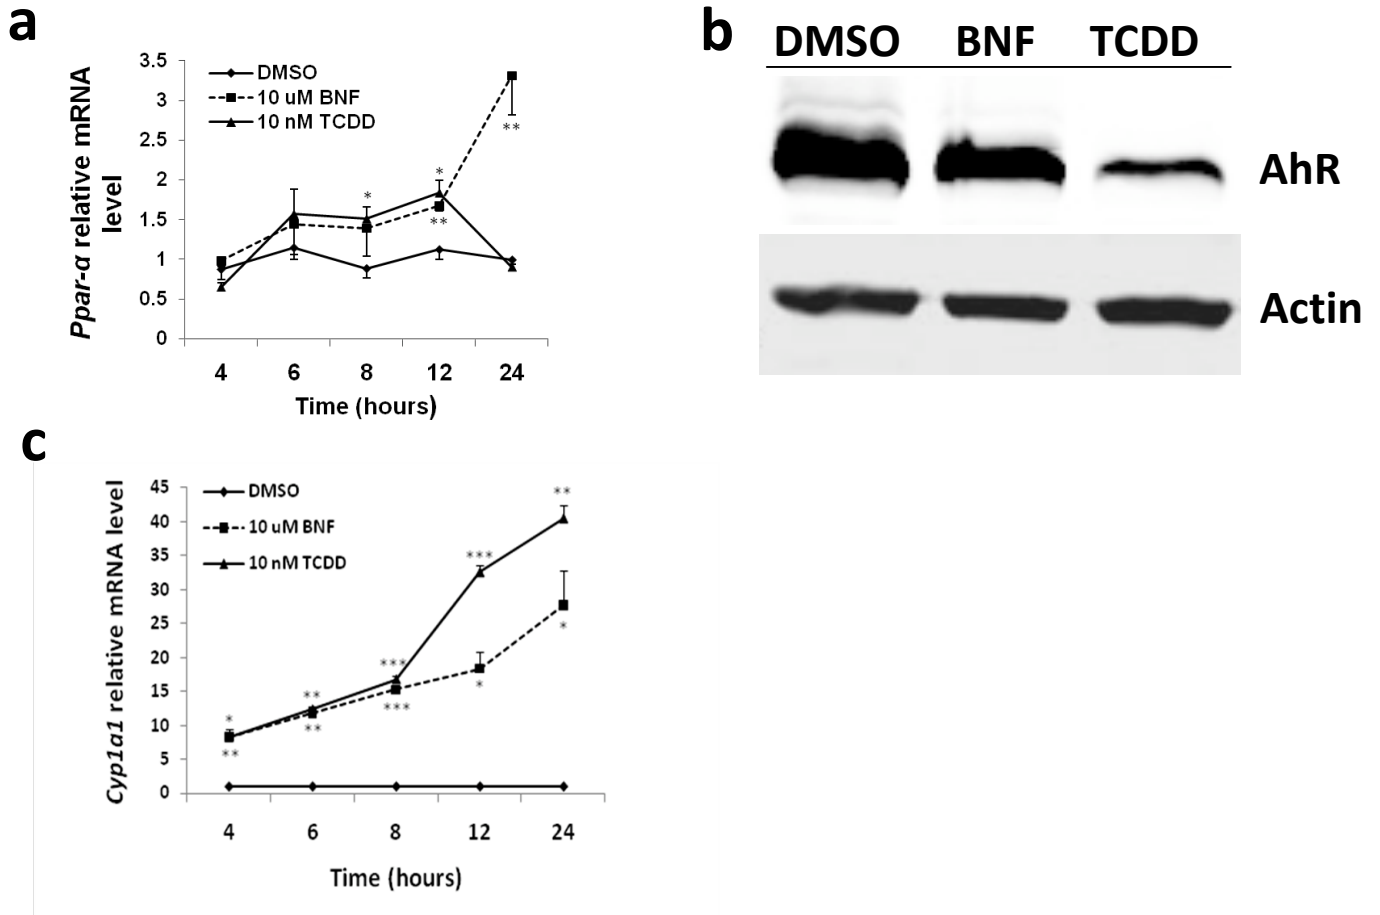

Supplemental Material, Figure 2. Effect comparison of TCDD and BNF on PPAR- $\alpha$  expression.

**a.** Time courses of *Ppar- $\alpha$*  mRNA levels in 10 nM TCDD or 10  $\mu$ M BNF treated *c7* cells. **b.** AhR protein expression in *c7* cells treated with 10 nM TCDD or 10  $\mu$ M BNF for 24 hr. **c.** *Cyp1A1* mRNA levels in cells described in **a**. Data are presented as mean  $\pm$  SEM of three replicates. \*,  $P < 0.05$ , \*\*,  $P < 0.01$  and \*\*\*,  $P < 0.001$  vs. DMSO control at different time points.

Supplemental Material, Figure 3

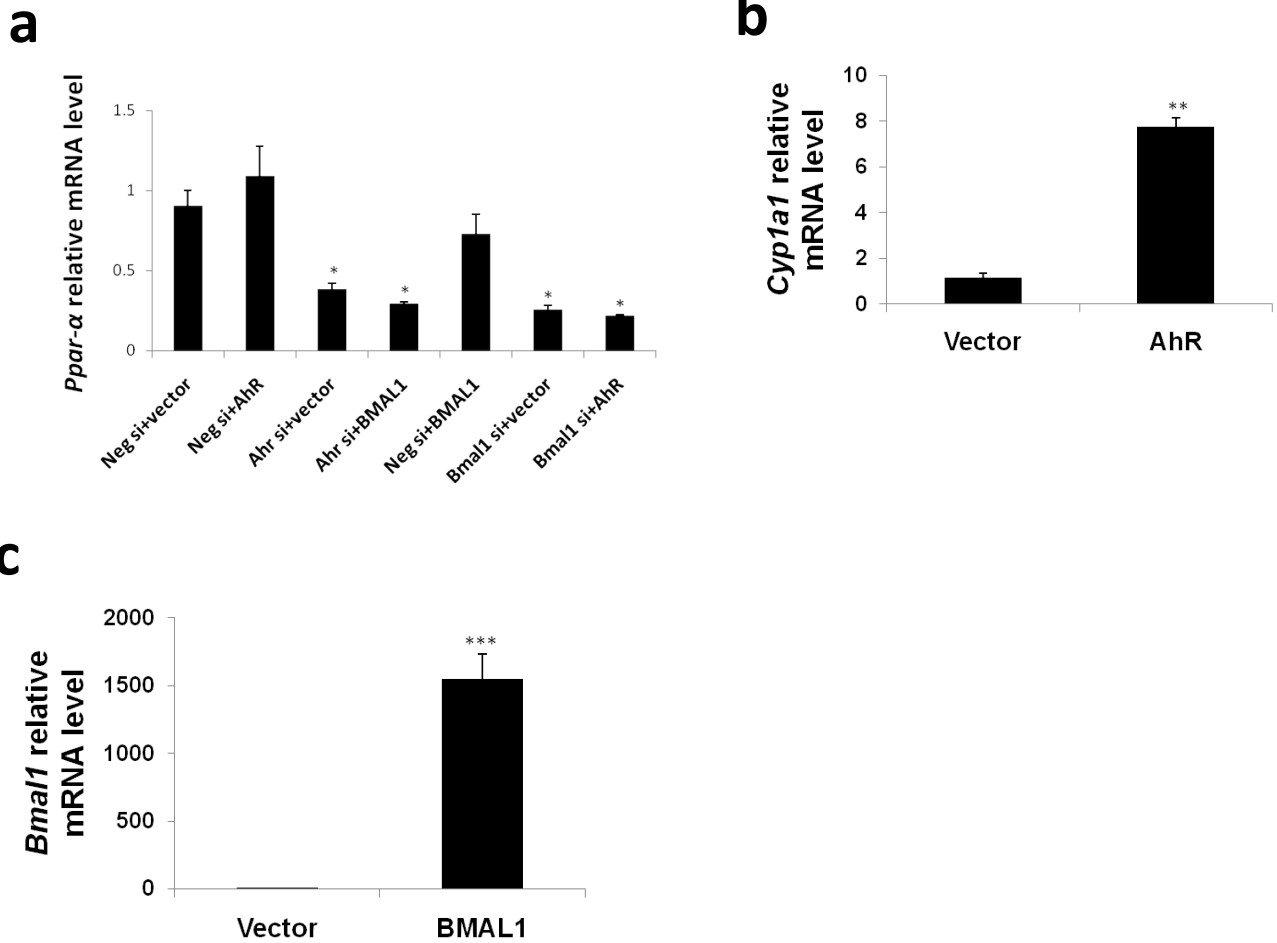

Supplemental Material, Figure 3. Effect of co-transfection of AhR/BMAL1 plasmid and BMAL1/AhR siRNA on PPAR- $\alpha$  expression.

a. qPCR analysis of *Ppar- $\alpha$*  in *Ahr/Bmal1* plasmid and *Bmal1/Ahr* siRNA co-transfected c7 cells.

b. qPCR analysis of *Cyp1A1* in c7 cells transfected with *Ahr* plasmid. c. qPCR analysis of *Bmal1*

in c7 cells transfected with *Bmal1* plasmid. Data are presented as mean  $\pm$  SEM of three replicates. \*,  $P < 0.05$ , \*\*,  $P < 0.01$  and \*\*\*,  $P < 0.001$  vs. Neg si and/or vector control. **AhR si:**

AhR siRNA; **BMAL1 si:** BMAL1 siRNA ; **Neg si:** negative siRNA; **AhR:** *Ahr* plasmid;

**BMAL:** *Bmal1* plasmid.

## References

- Bernal-Mizrachi C, Weng S, Feng C, Finck BN, Knutsen RH, Leone TC, et al. 2003. Dexamethasone induction of hypertension and diabetes is PPAR-alpha dependent in LDL receptor-null mice. *Nat Med* 9(8):1069-1075.
- Stone SJ, Myers HM, Watkins SM, Brown BE, Feingold KR, Elias PM, et al. 2004. Lipopenia and skin barrier abnormalities in DGAT2-deficient mice. *J Biol Chem* 279(12):11767-11776.
- Tordjman K, Bernal-Mizrachi C, Zeman L, Weng S, Feng C, Zhang F, et al. 2001. PPARalpha deficiency reduces insulin resistance and atherosclerosis in apoE-null mice. *J Clin Invest* 107(8):1025-1034.
